# Supplementary material for: Ab initio molecular dynamics simulations of aqueous triflic acid confined in carbon nanotubes
Source: Royal Society of Chemistry journal article supplement (doi:10.1039/c4cp01066c), 2014-01-01
Supplement: c4cp01066c1.pdf [file c4cp01066c1.pdf]

# **Ab initio Molecular Dynamics Simulations of Aqueous Triflic Acid Confined in Carbon Nanotubes**

**Jeffrey K. Clark II,<sup>†</sup> Bradley F. Habenicht,<sup>‡</sup> and Stephen J. Paddison<sup>†,\*</sup>**

<sup>†</sup>*Department of Chemical and Biomolecular Engineering, University of Tennessee, Knoxville, TN 37996*

<sup>‡</sup>*School of Natural Sciences, University of California, Merced, CA 95343*

## **Supplementary Information**

**Table S1.** Hydrogen bond data for the optimized 14N3 system using different methods.

| Functional | Avg. O...O Distance (Å)            |                                   | Avg. H...O Distance (Å)            |                                   | Avg. $ \delta $ (Å) <sup>†</sup>   |                                   |
|------------|------------------------------------|-----------------------------------|------------------------------------|-----------------------------------|------------------------------------|-----------------------------------|
|            | H <sub>2</sub> O/SO <sub>3</sub> H | H <sub>2</sub> O/H <sub>2</sub> O | H <sub>2</sub> O/SO <sub>3</sub> H | H <sub>2</sub> O/H <sub>2</sub> O | H <sub>2</sub> O/SO <sub>3</sub> H | H <sub>2</sub> O/H <sub>2</sub> O |
| PBE        | 2.65                               | 2.56                              | 1.65                               | 1.53                              | 0.64                               | 0.49                              |
| PBE0       | 2.64                               | 2.55                              | 1.66                               | 1.54                              | 0.67                               | 0.51                              |
| HSEsol     | 2.64                               | 2.55                              | 1.66                               | 1.54                              | 0.67                               | 0.51                              |
| PBE-D3     | 2.65                               | 2.57                              | 1.66                               | 1.53                              | 0.65                               | 0.49                              |
| optB86     | 2.67                               | 2.58                              | 1.67                               | 1.54                              | 0.66                               | 0.50                              |

<sup>†</sup>The value of  $\delta$  always has water molecules/solvated protons as the hydrogen bond donor.

**Table S2.** Hydrogen bond data for the optimized 17F3 system using different methods.

| Functional | Avg. O...O Distance (Å)            |                                   | Avg. H...O Distance (Å)            |                                   | Avg. $ \delta $ (Å) <sup>†</sup>   |                                   |
|------------|------------------------------------|-----------------------------------|------------------------------------|-----------------------------------|------------------------------------|-----------------------------------|
|            | H <sub>2</sub> O/SO <sub>3</sub> H | H <sub>2</sub> O/H <sub>2</sub> O | H <sub>2</sub> O/SO <sub>3</sub> H | H <sub>2</sub> O/H <sub>2</sub> O | H <sub>2</sub> O/SO <sub>3</sub> H | H <sub>2</sub> O/H <sub>2</sub> O |
| PBE        | 2.72                               | 2.51                              | 1.75                               | 1.42                              | 0.75                               | 0.32                              |
| PBE-D3     | 2.73                               | 2.51                              | 1.76                               | 1.42                              | 0.77                               | 0.32                              |
| optB86     | 2.75                               | 2.52                              | 1.77                               | 1.43                              | 0.78                               | 0.33                              |

<sup>†</sup>The value of  $\delta$  always has water molecules/solvated protons as the hydrogen bond donor.

**Table S3.** 14N3 dissociation data from sample MD runs using PBE and PBE-D2.<sup>†</sup>

| Functional | Bound | Shared:<br>SO <sub>3</sub> H/SO <sub>3</sub> H | Shared:<br>SO <sub>3</sub> H/H <sub>2</sub> O | Dissociated:<br>Zundel | Dissociated:<br>H <sub>3</sub> O <sup>+</sup> |
|------------|-------|------------------------------------------------|-----------------------------------------------|------------------------|-----------------------------------------------|
| PBE        | -     | -                                              | 0.025                                         | 0.276                  | 0.699                                         |
| PBE-D2     | -     | -                                              | 0.026                                         | 0.286                  | 0.688                                         |

<sup>†</sup> Data represents fraction of time spent in the different states

(a) 17N2

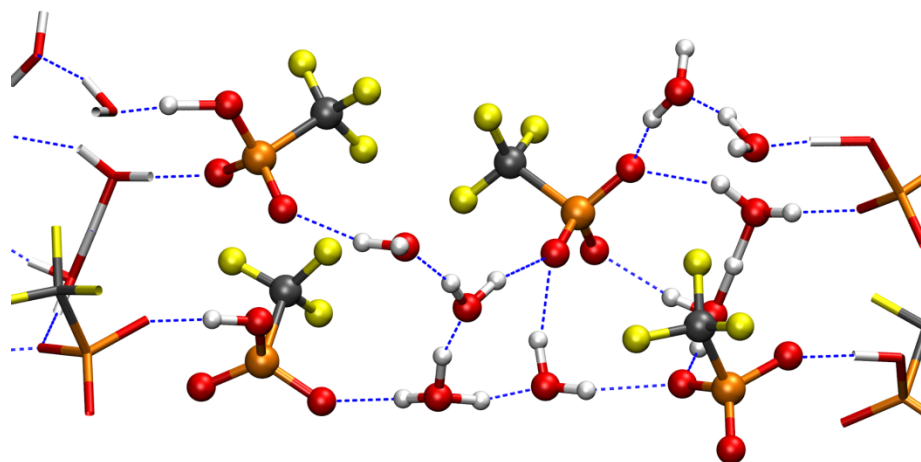

(b) 17F2

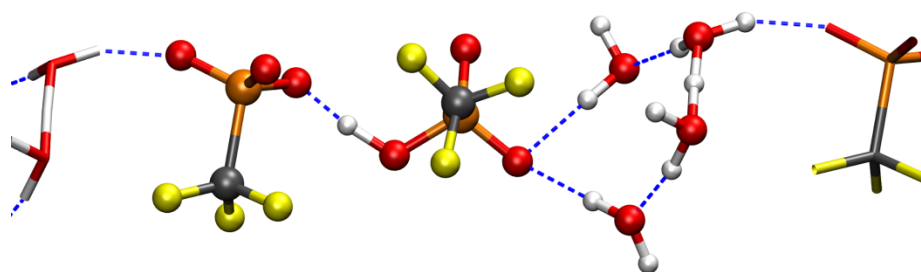

**Figure S1.** Snapshots showing ring formation in (a) 17N2 and (b) 17F2.

(a) 14N3

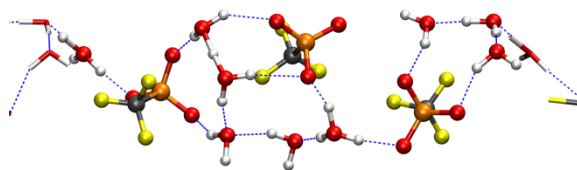

(b) 17N3

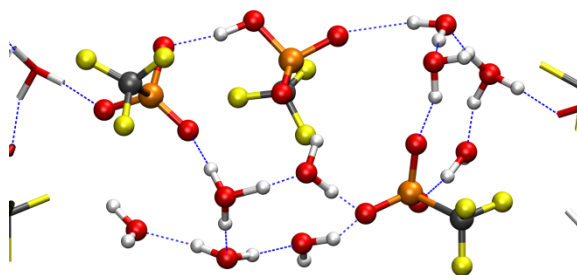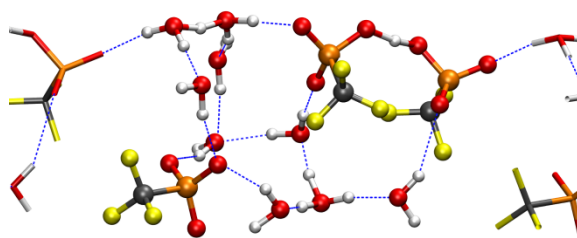

(c) 17F3

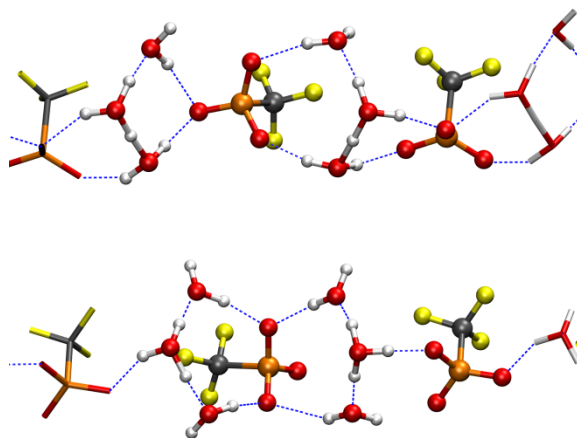

**Figure S2.** Snapshots showing ring formation in (a) 14N3, (b) 17N3 showing a 5-membered ring (top) and a 9-membered ring, and (c) 17F3 showing a 4-membered ring (top) and an 8-membered ring (bottom).

(a) 14N1

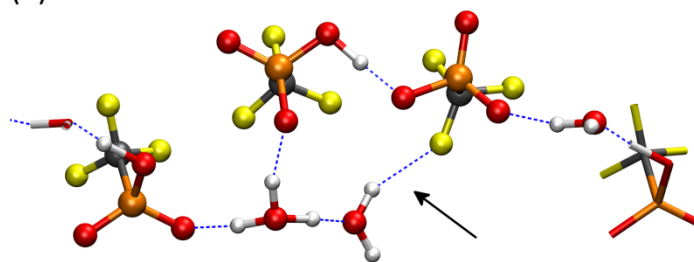

(b) 17N1

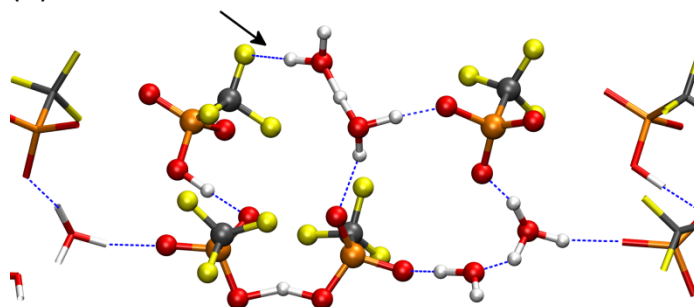

(c) 17N2

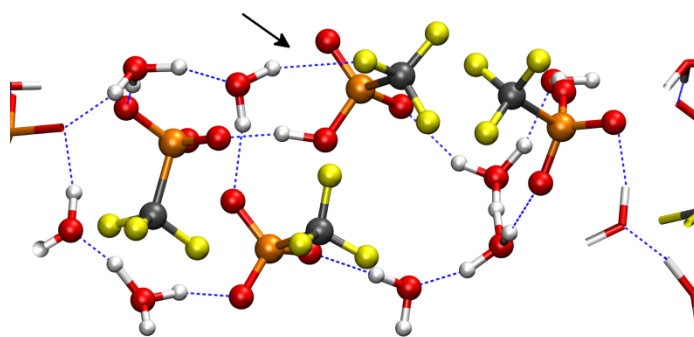

(d) 17N3

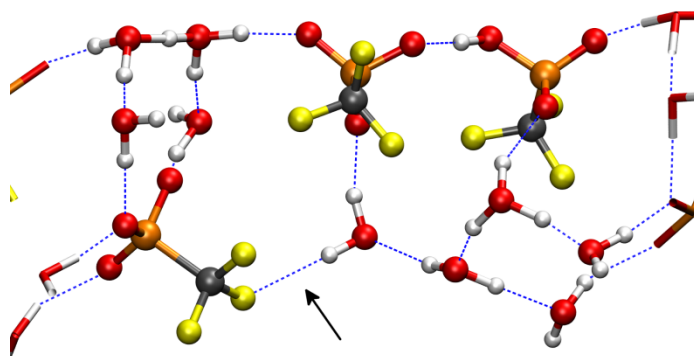

**Figure S3.** Snapshots of the bare CNT systems that contained OH...F hydrogen bond between water molecules and a fluorine atom of triflic acid over 15% of the time: (a) 14N1, (b) 17N1, (c) 17N2, and (d) 17N3.

(a) 14F1

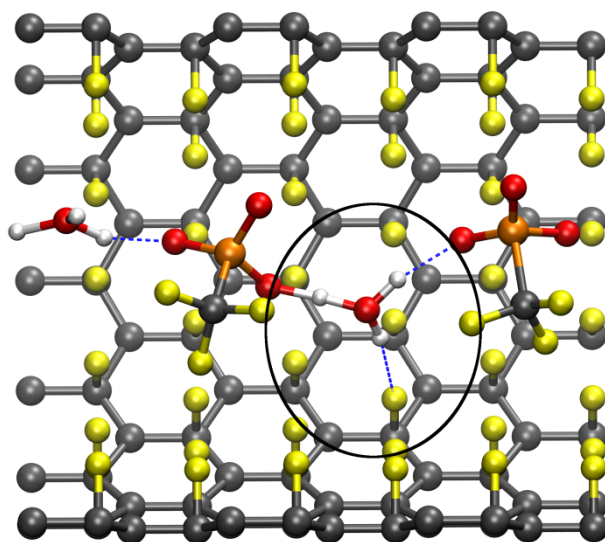

(b) 14F2

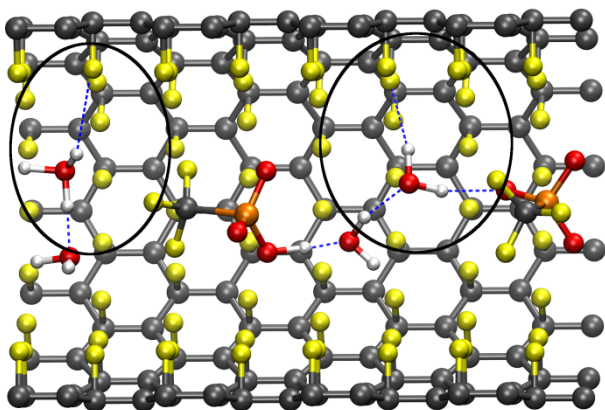

(c) 14F3

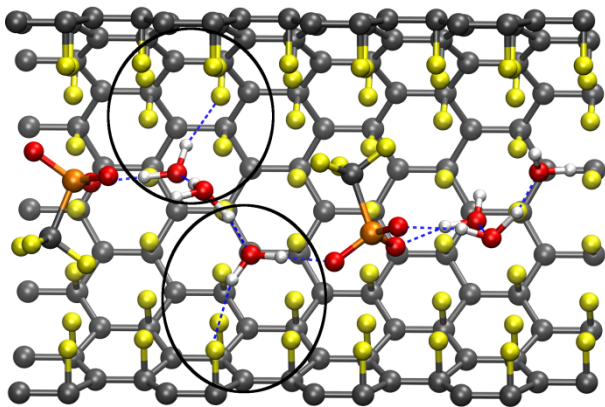

**Figure S4.** Snapshots of hydrogen bonding to the fluorinated wall in the smaller CNT systems: (a) 14F1, (b) 14F2, and (c) 14F3.

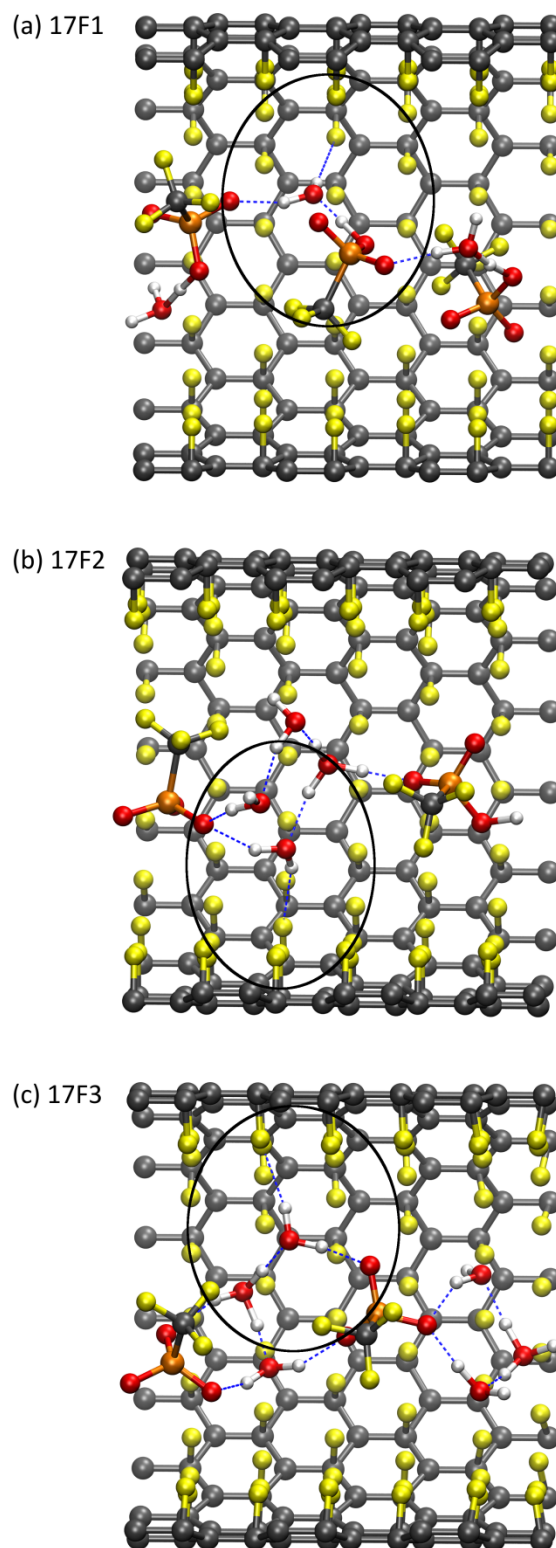

**Figure S5.** Snapshots of hydrogen bonding to the fluorinated wall in the larger CNT systems: (a) 17F1, (b) 17F2, and (c) 17F3.
